# Supplementary material for: The self prefers itself? Self-referential versus parental standards in face attractiveness
Source: PeerJ. 2014 Sep 25;2:e595. doi: 10.7717/peerj.595 (PMC4178458; doi:10.7717/peerj.595)
Supplement: Supplemental Information 3 [file peerj-02-595-s003.xlsx]

## Sheet: Morphs ranks raw data
Pair	Experimental Group	Prototype	Father	Self	Mother	Sex
1	control P	1.722	1.706	2.056	2.474	female
1	control P	1.722	2.5	2.176	1.556	female
10	control P	2	2.056	2.667	1.278	male
10	control P	1.556	2.056	2.111	2.278	male
11	control P	1.667	2.722	1.889	1.722	male
11	control P	1.111	2.889	1.556	2.444	male
12	control P	2.167	1.056	2	2.778	male
12	control P	1.667	2.722	2.611	1	male
13	control P	1.833	2.611	2.222	1.333	male
13	control P	1	2.278	1.722	3	male
14	control P	1.833	2.722	1.944	1.5	male
14	control P	1	2.222	1.706	3	male
15	control P	1.111	2.833	2.5	1.556	male
15	control P	1.389	2.833	1.722	2.056	male
16	control P	2.222	2.167	1	2.611	male
16	control P	1.5	2.556	1.889	2.056	male
17	control P	1.5	2.889	2	1.611	male
17	control P	1.889	2.222	2.167	1.722	male
18	control P	1.278	2.778	1.667	2.278	male
18	control P	1.222	2.556	1.722	2.556	male
2	control P	1.889	2.333	1.056	2.706	female
2	control P	2.444	2.167	2.222	1.222	female
3	control P	1.611	2.833	1.167	2.389	female
3	control P	1.722	3	1.444	1.833	female
4	control P	2	1.778	1.667	2.556	female
4	control P	1.778	2.833	1.111	2.278	female
5	control P	1.778	2.778	1.222	2.222	female
5	control P	2.111	2.944	1.111	1.778	female
6	control P	1.611	3	1.056	2.333	female
6	control P	1.588	1.421	2.778	2.222	female
7	control P	1.778	2.333	1.444	2.444	female
7	control P	2.389	2.167	1.444	2	female
8	control P	1.667	2.889	1.778	1.722	female
8	control P	2.111	1.389	2.111	2.389	female
9	control P	1.611	2.333	2.389	1.667	female
9	control P	1.722	2.444	1.889	1.944	female
1	experimental P	1.389	2.611	1.941	2	female
1	experimental P	2.167	1.167	2	2.611	female
10	experimental P	1.833	2.611	2.111	1.444	male
10	experimental P	1.722	1.667	2.278	2.333	male
11	experimental P	2.444	2.444	2.111	1	male
11	experimental P	1.056	3	1.722	2.222	male
12	experimental P	1.944	1.105	2.056	3	male
12	experimental P	1.722	1.944	2.056	2.278	male
13	experimental P	1.222	2.167	1.944	2.667	male
13	experimental P	2.333	3	1.389	1.278	male
14	experimental P	1.778	2.722	1	2.5	male
14	experimental P	1.389	2.222	2.556	1.833	male
15	experimental P	1.444	2.833	1.778	1.944	male
15	experimental P	2.389	1.789	1	2.882	male
16	experimental P	1.833	2.056	2.111	2	male
16	experimental P	1.778	1.944	1.778	2.5	male
17	experimental P	1.105	3	1.944	2	male
17	experimental P	2.167	2.667	1.778	1.389	male
18	experimental P	1.944	1.667	1.667	2.722	male
18	experimental P	2	2.833	2.111	1.056	male
2	experimental P	2.278	2.167	1.056	2.5	female
2	experimental P	1.895	2.125	1.368	2.118	female
3	experimental P	2.056	2.056	1.333	2.667	female
3	experimental P	1.5	2.722	1.118	2.579	female
4	experimental P	1.632	2.579	1.778	2	female
4	experimental P	2.778	1.944	2.222	1.056	female
5	experimental P	1.889	2.222	1.5	2.389	female
5	experimental P	2.333	2.778	1.222	1.667	female
6	experimental P	2.444	2.5	1.056	2	female
6	experimental P	1.556	2.778	1.444	2.222	female
7	experimental P	2.278	1.833	1.444	2.444	female
7	experimental P	1.778	2.111	1.222	2.889	female
8	experimental P	1.444	1.944	2.722	1.889	female
8	experimental P	2.611	2.333	1.111	2	female
9	experimental P	1.556	3	1.722	1.722	female
9	experimental P	2.167	2.167	1.556	2.167	female
